# Supplementary material for: The effect of nanocrystalline silicon host on magnetic properties of encapsulated iron oxide nanoparticles
Source: Royal Society of Chemistry journal article supplement (doi:10.1039/c5nr05232g), 2015-01-01
Supplement: c5nr05232g2.pdf [file c5nr05232g2.pdf]

## Supporting Information.

### The Effect of Nanocrystalline Silicon Host on Magnetic Properties of Encapsulated Iron Oxide Nanoparticles

Petra Granitzer\*, Klemens Rumpf, Roberto Gonzalez-Rodriguez, Jeffery Coffey, Michael Reissner

*Dr. P. Granitzer*

*Institute of Physics, Karl-Franzens-University Graz, Universitaetsplatz 5, A-8010 Graz, Austria, [petra.granitzer@uni-graz.at](mailto:petra.granitzer@uni-graz.at)*

*Dr. K. Rumpf*

*Institute of Physics, Karl-Franzens-University Graz, Universitaetsplatz 5, A-8010 Graz, Austria*

*R. Gonzalez-Rodriguez*

*Department of Chemistry, Texas Christian University, Fort Worth, TX, USA*

*Prof. Jeffery L. Coffey*

*Department of Chemistry, Texas Christian University, Fort Worth, TX, USA*

*Prof. M. Reissner*

*Institute of Solid State Physics, Vienna University of Technology, Wiedner Hauptstr. 8, 1040 Vienna, Austria*

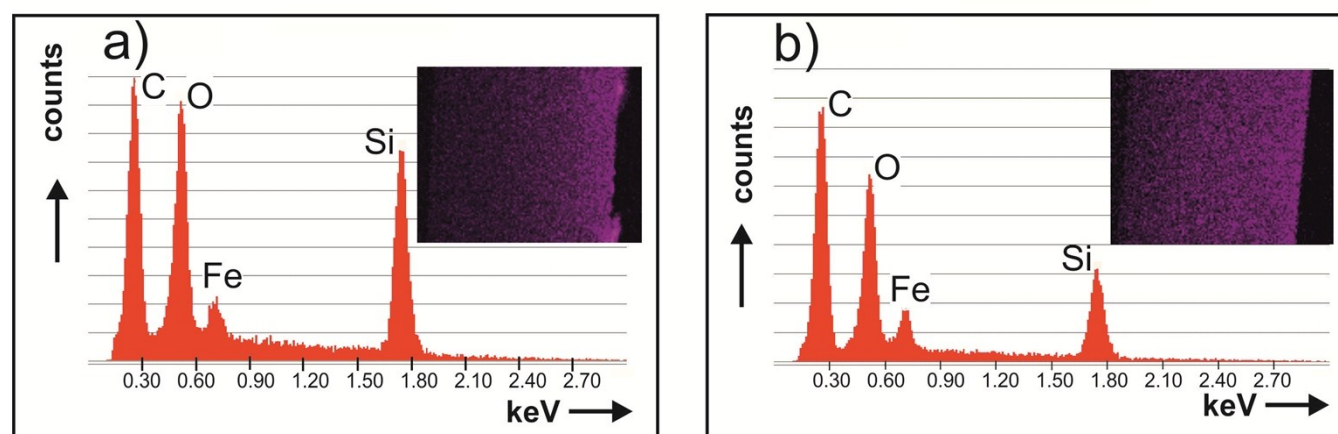

**Supplementary Figure 1.** Energy dispersive X-ray spectra of PSi filled with Fe<sub>3</sub>O<sub>4</sub>-NPs of (a) 8 nm and (b) of 5 nm. The inset shows the corresponding mapping of a cross-sectional region.

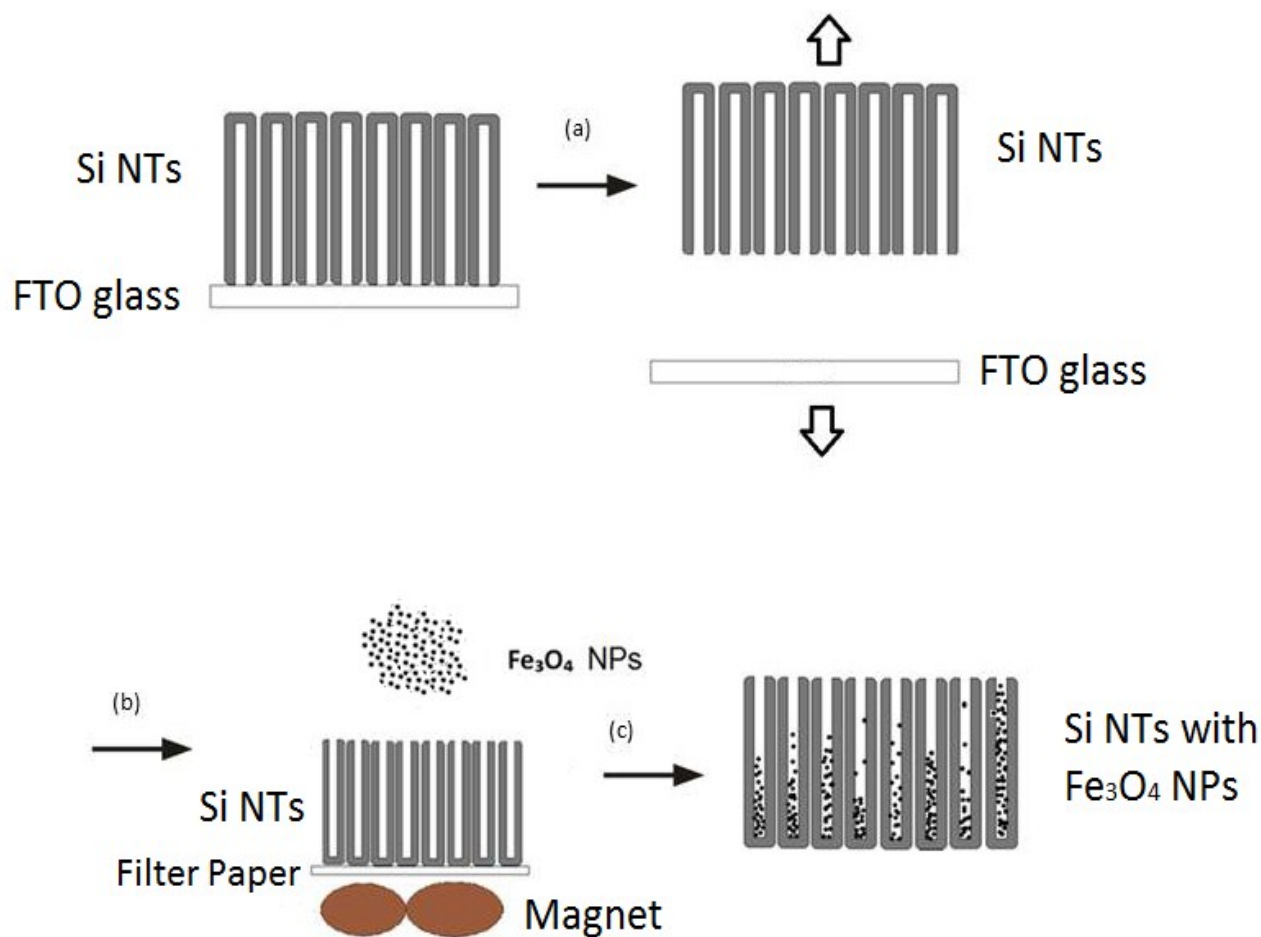

**Supplementary Figure 2.** Process for loading Fe<sub>3</sub>O<sub>4</sub> NPs into Si NTs, consisting of: (a) physical detachment of SiNTs grown on a substrate and inversion of the NT film, followed by (b) dropwise addition of a solution of Fe<sub>3</sub>O<sub>4</sub> NPs, facilitated by placing a Nd magnet underneath the film; (c) subsequent formation of the Fe<sub>3</sub>O<sub>4</sub> NP-loaded SiNTs.

**Supplementary Table 1.** Size dependent blocking temperatures of SiNTs of 10 nm wall thickness filled with Fe<sub>3</sub>O<sub>4</sub> NPs.

| NP size (nm) | SiNTs TB (K) |
|--------------|--------------|
| 4            | 10           |
| 5            | 12           |
| 8            | 16           |
| 10           | 40           |

# 10 nm Fe<sub>3</sub>O<sub>4</sub> Nanoparticles (Sigma-Aldrich)

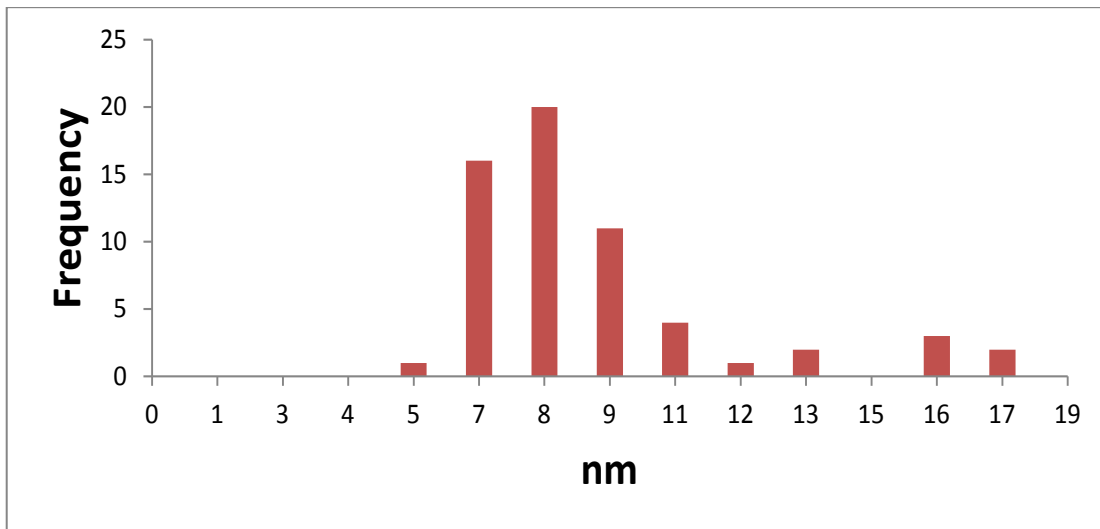

|      |       |
|------|-------|
| Mean | 9.61  |
| SD   | 2.85  |
| Min  | 6.61  |
| Max  | 18.10 |

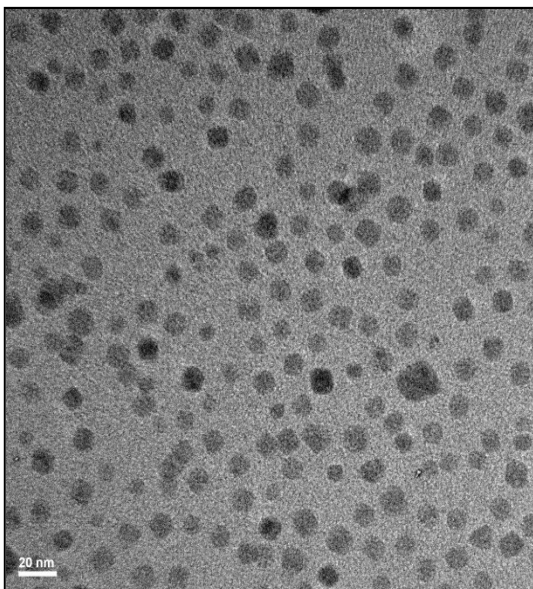

**Supplementary Figure 3.** TEM image and associated size distribution data for a commercial Fe<sub>3</sub>O<sub>4</sub> NP sample (Aldrich) with stated average particle size of 10 nm.

**Supplementary video.**

Brief video demonstrating the ability of  $\text{Fe}_3\text{O}_4$  nanoparticles loaded into silicon nanotubes to be manipulated by a simple bar magnet.
